# Supplementary material for: Genes adopt non-optimal codon usage to generate cell cycle-dependent oscillations in protein levels
Source: PubMed Central journal article supplement — Mol Syst Biol. 2012 Feb 28;8:572. doi: 10.1038/msb.2012.3 (PMC3293633; doi:10.1038/msb.2012.3), 2012-02-28
Supplement: msb20123-s2.pdf [file msb20123-s2.pdf]

## Genes adopt non-optimal codon usage to generate cell cycle-dependent oscillations in protein levels

Milana Frenkel-Morgenstern, Tamar Danon, Thomas Christian, Takao Igarashi, Lydia Cohen, Ya-Ming Hou and Lars Juhl Jensen

*Corresponding author: Milana Frenkel-Morgenstern, Spanish National Cancer Research Centre CNIO*

---

|                         |                  |                  |
|-------------------------|------------------|------------------|
| <b>Review timeline:</b> | Submission date: | 25 November 2011 |
|                         | Revised:         | 10 January 2012  |
|                         | Accepted:        | 11 January 2012  |

---

An earlier version of this manuscript was submitted to Molecular Systems Biology before September 2010. As the original review of the manuscript therefore predates the implementation of the journal's transparent review process policy, no Peer Review Process File is available with this article.
